# Supplementary material for: Exploring the cockatiel (Nymphicus hollandicus) fecal microbiome, bacterial inhabitants of a worldwide pet
Source: PubMed Central journal article supplement (PMC5183021; doi:10.7717/peerj.2837), 2016-12-22

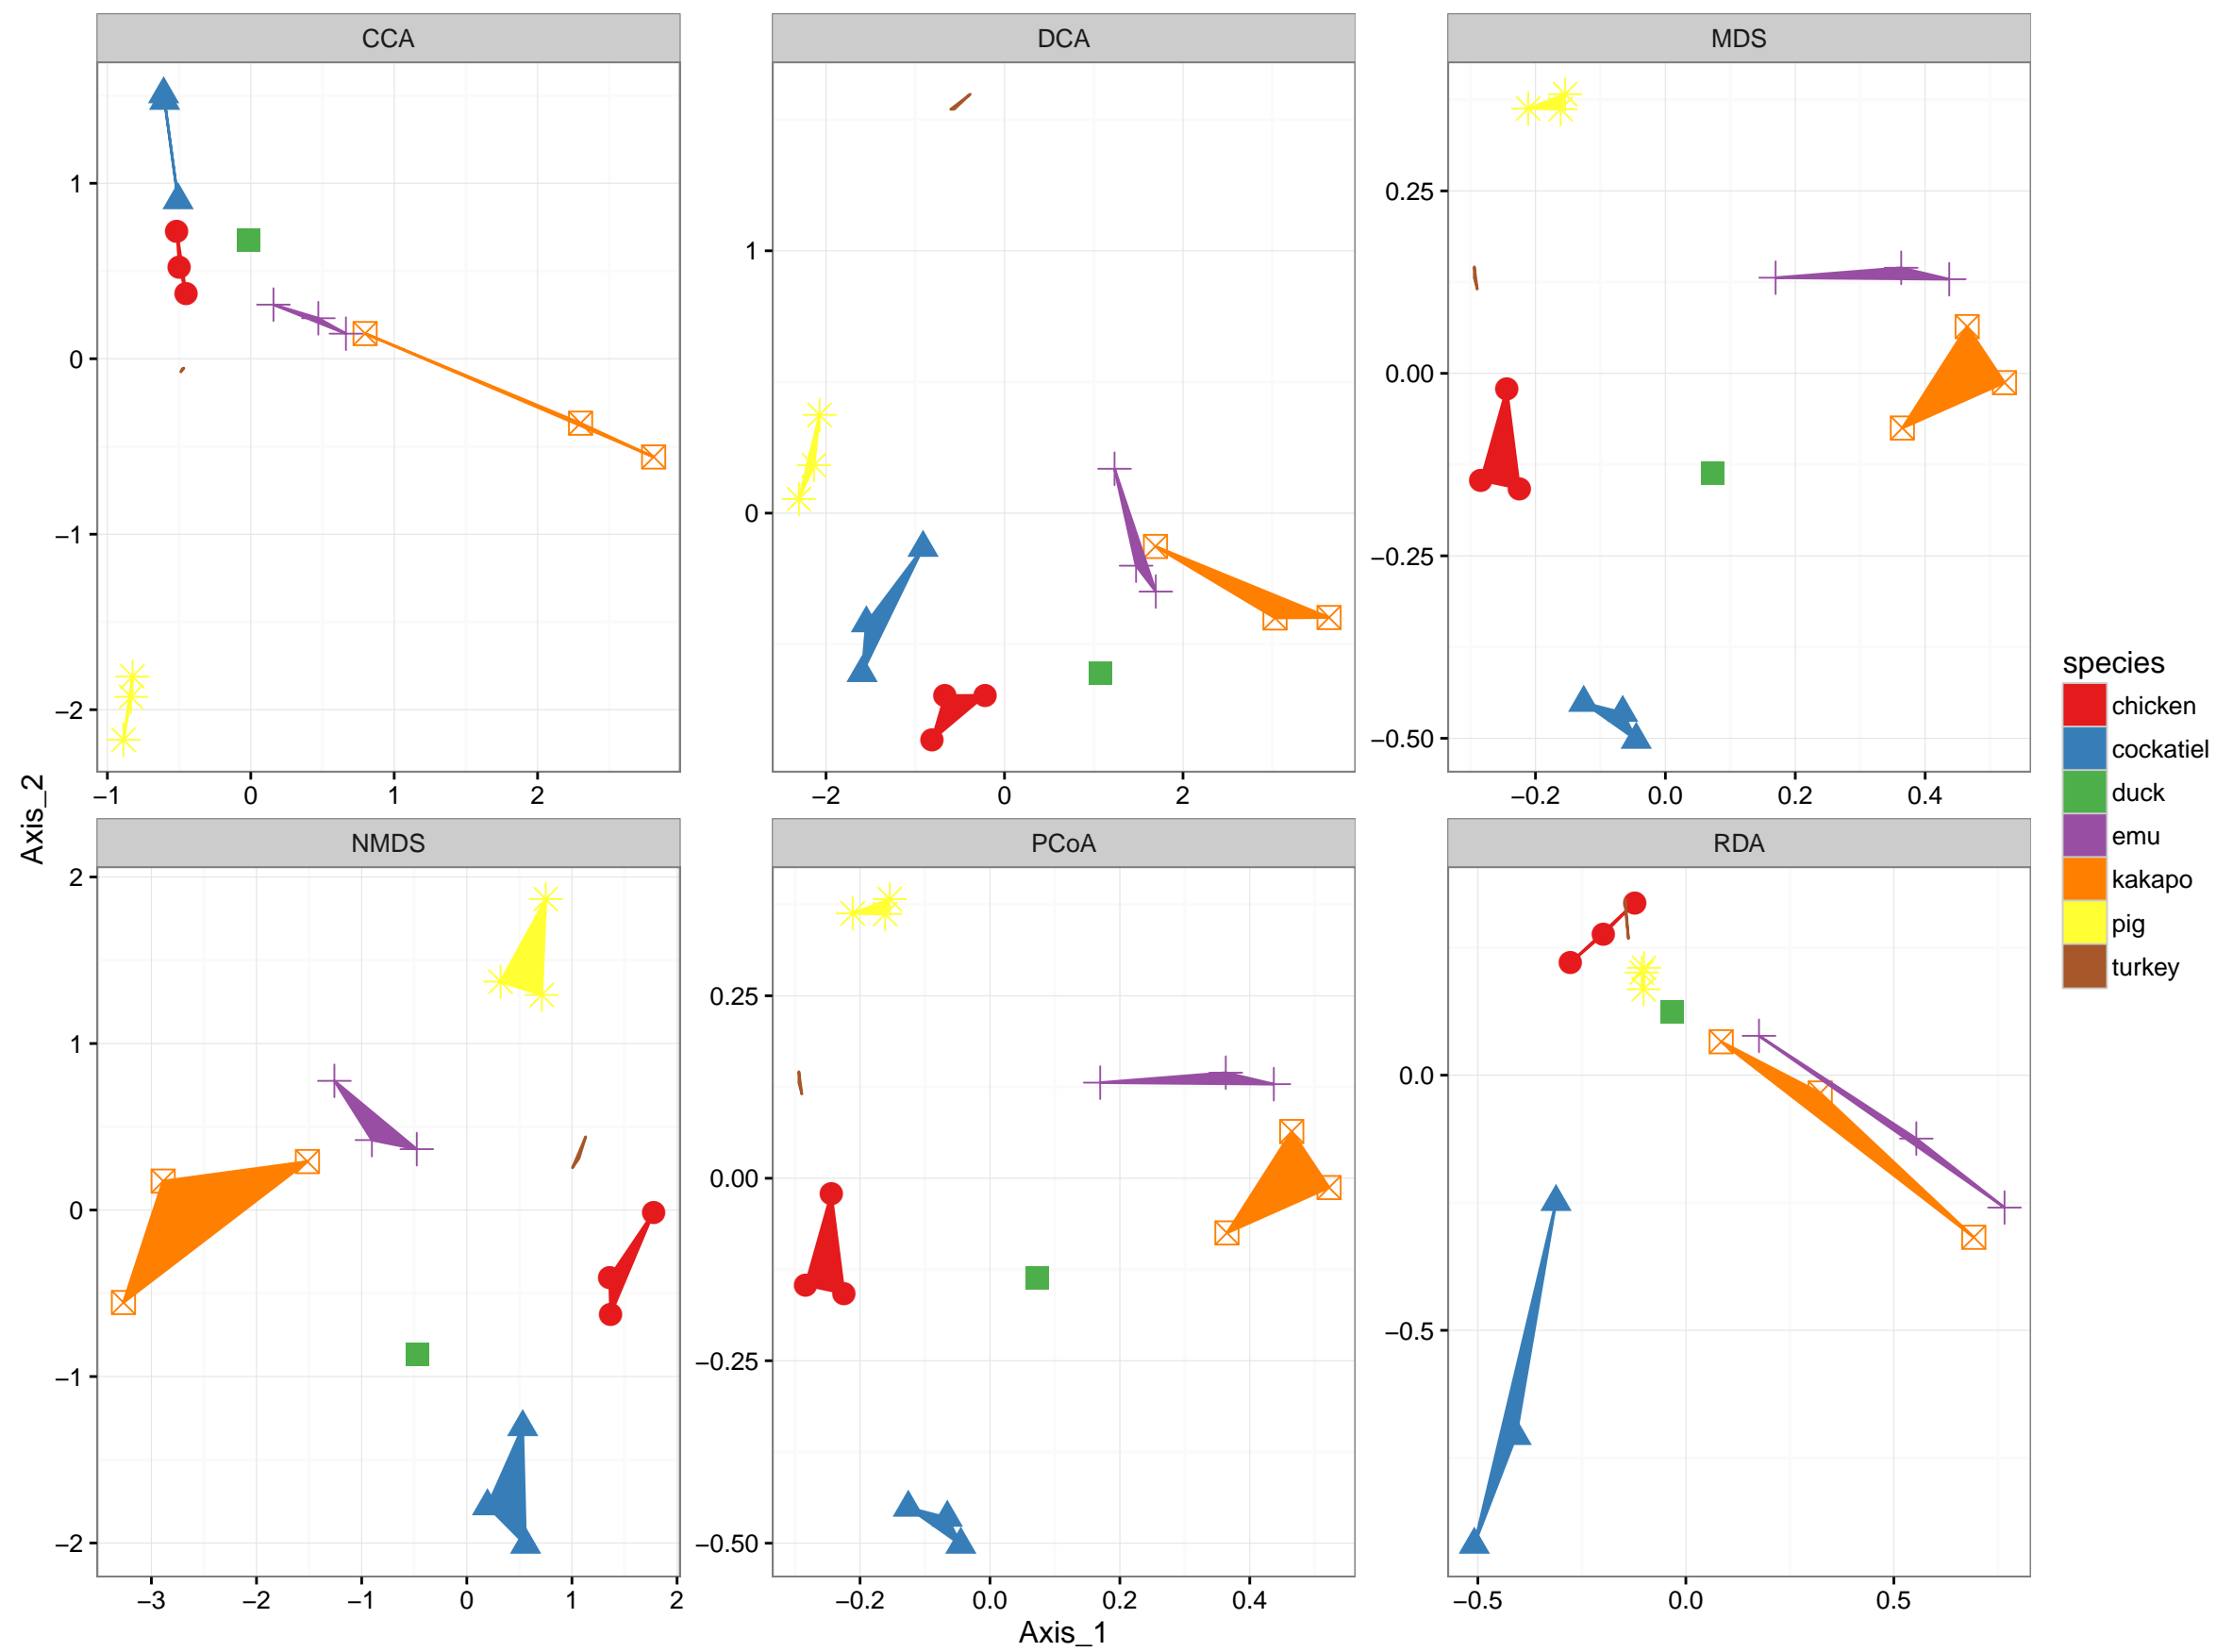

Supplement: peerj-04-2837-s003.pdf [file peerj-04-2837-s003.pdf]
